# 1 **Increased resistance of SARS-CoV-2 Omicron Variant to** 2 **Neutralization by Vaccine-Elicited and Therapeutic Antibodies**

3

4 Takuya Tada<sup>1,\*</sup>, Hao Zhou<sup>1,\*</sup>, Belinda M. Dcosta<sup>1</sup>, Marie I. Samanovic<sup>2</sup>, Vidya Chivukula<sup>1</sup>, Ramin  
5 S. Herati<sup>2</sup>, Stevan R. Hubbard<sup>3</sup>, Mark J. Mulligan<sup>2,+</sup>, and Nathaniel R. Landau<sup>1,+,#</sup>

6

## 7 **Affiliation:**

8 <sup>1</sup>Department of Microbiology, NYU Grossman School of Medicine, New York, NY, USA.

9 <sup>2</sup>NYU Langone Vaccine Center and Department of Medicine, NYU Grossman School of  
10 Medicine, New York, NY, USA.

11 <sup>3</sup>Department of Biochemistry and Molecular Pharmacology, NYU Grossman School of Medicine,  
12 New York, NY, USA.

13

14 \* and + These authors contributed equally

15

16 #Corresponding author:

17

18 Nathaniel R. Landau, Ph.D.

19 NYU Grossman School of Medicine

20 430 East 29th Street, Alexandria West Building, Rm 509, New York, NY 10016

21 Email: [nathaniel.landau@med.nyu.edu](mailto:nathaniel.landau@med.nyu.edu)

22 Phone: (212) 263-9197

23

24 Keywords: SARS-CoV-2, Omicron, BNT162b2, mRNA-1273, antibody neutralization,

25 therapeutic monoclonal antibodies

## 26 **Summary**

27 Currently authorized vaccines for SARS-CoV-2 have been highly successful in preventing  
28 infection and lessening disease severity. The vaccines maintain effectiveness against SARS-  
29 CoV-2 Variants of Concern but the heavily mutated, highly transmissible Omicron variant poses  
30 an obstacle both to vaccine protection and monoclonal antibody therapies. Analysis of the  
31 neutralization of Omicron spike protein-pseudotyped lentiviruses showed a 26-fold relative  
32 resistance (compared to D614G) to neutralization by convalescent sera and 26-34-fold  
33 resistance to Pfizer BNT162b2 and Moderna vaccine-elicited antibodies following two  
34 immunizations. A booster immunization increased neutralizing titers against Omicron by 6-8-fold.  
35 Previous SARS-CoV-2 infection followed by vaccination resulted in the highest neutralizing titers  
36 against Omicron. Regeneron REGN10933 and REGN10987, and Lilly LY-CoV555 and LY-  
37 CoV016 monoclonal antibodies were ineffective against Omicron, while Sotrovimab was  
38 partially effective. The results highlight the benefit of a booster immunization in providing  
39 protection against Omicron but demonstrate the challenge to monoclonal antibody therapies.

40

## 41 **Introduction**

42 The vaccines that have been granted emergency use authorization (EUA) have proven highly  
43 protective against SARS-CoV-2, resulting in a major decrease in infection rates, hospitalization  
44 and deaths [1]; however, the appearance of recently evolved viral variants classified as variants  
45 of concern (VOC) [2] that contain multiple mutations in the viral spike protein have raised  
46 concerns about potential decreases in vaccine effectiveness. These concerns have been  
47 assuaged by laboratory findings of modest 2-5-fold decreases in neutralizing antibody titer  
48 against the VOCs [2-7] and epidemiological evidence of continued vaccine protection [8, 9].  
49 Vaccination has been found to provide 78% protection against infection by the Delta variant,  
50 90% protection against hospitalization and 91% protection against death [10]. Vaccines with  
51 current EUA status include the BNT162b2 and Moderna mRNA-1273 mRNA-based vaccines  
52 and J&J Janssen Ad26.COVS adenovirus vector-vaccine. In addition to vaccination,  
53 monoclonal antibody therapies have proven effective in preventing hospitalization and death.  
54 Monoclonal antibody cocktails from Regeneron consisting of REGN10933 (Casirivimab) and  
55 REGN10987 (Imdevimab), and from Eli Lilly consisting of LY-CoV016 (Etesevimab) and LY-  
56 CoV555 (Bamlanivimab) have proven effective at decreasing the frequency of hospitalization of  
57 COVID-19 patients [11-13]. The GlaxoSmithKline/Vir Biotechnology monoclonal antibody VIR-  
58 7183 has been shown to decrease hospitalization and risk of death by 79% in adults at high risk  
59 and has been granted EUA authorization by the U.S. Food and Drug Agency for the treatment  
60 of COVID-19 [15].

61  
62 The identification of the newly emergent Omicron (B.1.1.529) SARS-CoV-2 variant has raised  
63 concerns about possible reductions in vaccine effectiveness. The variant was identified in  
64 COVID-19 patients in Botswana in early November, 2021 where it rapidly rose to a prevalence  
65 of 71% and was shortly thereafter identified in infected individuals in South Africa[16].  
66 Prevalence of the Omicron variant has continued to increase rapidly as a result of the increased  
67 transmissibility of the virus, having now replaced Delta as the predominant variant in the U.S.

68 with a current prevalence of 73.2% and up to 90% in metropolitan areas. While the vaccines  
69 have proven effective against earlier VOCs, the large number of mutations in the Omicron spike  
70 protein present the possibility of decreased antibody neutralizing titers against the Omicron  
71 variant, which could result in decreased protection from infection and disease.

72

73 As compared to the previously designated VOC spike proteins that contain 9-11 missense  
74 mutations, the Omicron spike protein has 34, 20 of which have not been found in previous  
75 VOCs or variant of interests (VOIs). These include 15 mutations in the receptor binding domain  
76 (RBD), 8 of which lie in the receptor binding motif (RBM) that directly contacts the receptor. The  
77 amino-terminal domain (NTD) has 8 mutations, 3 of which are deletions and one is a 3 amino  
78 acid insertion. The carboxy-terminal CTD has 10 mutations, 4 of which are close to the furin  
79 proteolytic processing site and three of which are close to the secondary processing site. The  
80 concomitant appearance of the multiple mutations in the Omicron virus suggests that some may  
81 have arisen from recombination with a related  $\beta$ -coronavirus or from extended replication in a  
82 chronically infected immunodeficient individual [17].

83

84 The large number of mutations in the Omicron RBD and NTD, which are the primary sites  
85 targeted by neutralizing antibodies, raises the possibility that the variant may be resistant to  
86 neutralization by current EUA approved vaccine-elicited antibodies, resulting in decreased  
87 protection from infection. It also raises the possibility that individuals previously infected with an  
88 earlier version of the virus might not be protected against re-infection by the Omicron variant. In  
89 addition, it raises a concern that the heavily mutated Omicron RBD might cause the failure of  
90 therapeutic monoclonal antibodies currently in clinical use to neutralize the virus, decreasing the  
91 effectiveness of their use in the treatment of severe COVID-19.

92

93 In this study, we used spike protein-pseudotyped lentiviral particles to measure the sensitivity of  
94 the Omicron variant to neutralization by vaccine-elicited antibodies in the sera of both naïve and

95 recovered individuals and analyzed the neutralizing activity of the widely used therapeutic  
96 monoclonal antibodies. We found that the Omicron spike protein-pseudotyped virus was highly  
97 resistant to neutralization by the serum antibodies of individuals fully vaccinated with two  
98 immunizations of the Pfizer or Moderna mRNA vaccines. A homologous booster vaccination for  
99 individuals fully vaccinated with an mRNA vaccine increased neutralizing antibody titers 5-fold to  
100 a level predicted to provide a high degree of protection. Of concern, the monoclonal antibodies  
101 that constitute the Regeneron and Eli Lilly cocktails failed to neutralize virus with the Omicron  
102 spike protein. Sotrovimab was partially effective against the Omicron-pseudotyped virus.  
103

## 104 **Material and Methods**

### 105 **Plasmids**

106 Plasmid expression vectors used in the production of lentiviral pseudotypes pMDL, pcVSV.G,  
107 pRSV.Rev and the lentiviral dual reporter virus genome pLenti.GFP.nLuc have been previously  
108 described [17]. The SARS-CoV-2 Omicron spike expression vector pc.Δ19.Omicron was  
109 chemically synthesized in two fragments encoding the codon-optimized open reading frame  
110 overlapping by 50 bp. The full-length coding sequence was generated by overlap extension  
111 PCR with the two fragments amplified with external primers containing a Kpn-I and Xho-I sites  
112 and then cloned into pcDNA6. Expression vectors encoding spike proteins with the individual  
113 mutations of the Omicron spike protein were generated by overlap extension PCR mutagenesis  
114 using the D614G spike protein plasmid pcCOV2.Δ19.D614G as template.

115

### 116 **Cells**

117 293T, ACE2.293T and Vero cells were grown in Dulbecco's Modified Eagle's Medium/10% fetal  
118 bovine serum at 37°C under 5% CO<sub>2</sub>.

119

### 120 **Human sera and monoclonal antibodies**

121 Human sera were collected at the NYU Vaccine Center with written consent of participants  
122 under IRB-approved protocols 18-02035 and 18-02037. Sera from convalescent were collected  
123 32-57 days post-symptom onset. Sera from Pfizer BNT162b2-vaccinated, Moderna mRNA-  
124 1273-vaccinated study participants which were shown in Figure 1B were collected 90 and 80  
125 days mean post-second immunization, respectively. Serum samples from study participants  
126 previously infected and subsequently vaccinated with BNT162b2 mRNA vaccine which shown in  
127 Figure 1C and 1D were collected 1 month and 7-8 months days post-second immunization.  
128 Sera from study participants vaccinated with BNT162b2 mRNA third boost vaccine were  
129 collected 1-month post-vaccination. Previous infection was documented by COVID-19  
130 symptoms and a positive PCR test or serology.

131

## 132 **SARS-CoV-2 spike protein lentiviral pseudotypes**

133 Spike protein pseudotyped lentiviruses were produced by cotransfection of 293T cells with  
134 pMDL Gag/Pol packaging vector, lentiviral vector plenti.GFP.nLuc and spike protein expression  
135 vectors encoding 19 amino acid cytoplasmic tail deletions, as previously reported [17].  
136 Transfected cell supernatants were harvested two days post-transfection and concentrated by  
137 ultracentrifugation. The viruses were normalized for reverse transcriptase (RT) activity and  
138 frozen in aliquots at -80°C.

139

## 140 **Antibody neutralization assay**

141 Sera or monoclonal antibody was serially two-fold diluted and then incubated with an amount of  
142 virus corresponding to a volume that resulted in MOI=0.2 on ACE2.293T or Vero cells for  
143 pseudotyped virus. After 30-minute incubation at room temperature, the virus was added to 1 X  
144 10<sup>4</sup> target cells in a 96 well culture dish. The cells were cultured for 2 days after which the  
145 culture medium was removed and 50µl Nano-Glo luciferase substrate (Nanolight) was added.  
146 Luminescence was read in an Envision 2103 microplate luminometer.

147

## 148 **Data analysis**

149 All samples were tested in duplicate or triplicate. Data were analyzed using GraphPad Prism 8  
150 software and statistical significance was determined by the two-tailed unpaired t-test or  
151 nonparametric ANOVA test. Significance was based on two-sided testing and attributed to p<  
152 0.05. Confidence intervals are shown as the mean ± SD or SEM (\*P≤0.05, \*\*P≤0.01, \*\*\*P≤0.001,  
153 \*\*\*\*P≤0.0001). Analyses of the structures of the SARS-CoV-2 spike protein with antibody Fabs  
154 was performed with the PyMOL Molecular Graphics System, v2.1.1 (Schrödinger, LLC).

155

## 156 **Results**

### 157 **Increased resistance of virus with the Omicron spike to serum antibodies elicited by** 158 **natural infection and vaccination.**

159 To determine the effectiveness of antibodies induced by infection with earlier SARS-CoV-2  
160 variants to protect from re-infection with the Omicron variant, we tested neutralizing antibody  
161 titers in the sera of unvaccinated participants involved in an ongoing clinical study that had been  
162 collected 32 to 57 days post-COVID-19 symptom onset. Neutralizing antibody titers were  
163 measured using lentiviral virions pseudotyped by the parental D614G, Alpha, Beta and Delta  
164 spike proteins, an assay that accurately reflects titers obtained in the plaque reduction  
165 neutralization test (PRNT). The results showed modest reductions in neutralizing titer against  
166 Beta and Delta as compared to the parental D614G but a more substantial average 26-fold  
167 reduction in titer against Omicron. Approximately 60% of the donor sera had titers below the  
168 IC<sub>50</sub> of 20 limit of detection in the assay (**Fig. 1A**). To determine the effectiveness of antibodies  
169 elicited by vaccination, we tested sera collected 70 days post-immunization from study  
170 participants who had been fully vaccinated (two immunizations) with BNT162b2 or Moderna  
171 mRNA-1273 mRNA vaccines (**Fig. 1B**). Titers against the D614G virus were 3-4-fold higher  
172 than those of the convalescent patient sera and the general pattern of neutralization of the  
173 variants was similar. Notably, neutralizing antibody titers against the Omicron pseudotype was  
174 decreased 26-34-fold compared to D614G.

175

176 Previous infection has been shown to strengthen and broaden the neutralizing antibody  
177 response to SARS-CoV-2 variants upon vaccination. To determine whether previous infection  
178 would increase neutralizing antibody titers against the Omicron variant, we tested sera from  
179 study participants who were vaccinated with BNT162b2 and had, or had not, been previously  
180 infected with SARS-CoV-2 (**Fig. 1C**). Sera from study participants without previous infection,  
181 collected one month post-second vaccination, had high titers of neutralizing antibody against  
182 D614G virus; titers against Beta compared to D614G were decreased 2.8-fold, against Delta



183 1.4-fold and against Omicron 18-fold. Titers were had only slightly declined 7-8 months post-  
184 vaccination. One-month post-boost, titers increased for all variants. Titers against Omicron  
185 remained 14-fold lower than against D614G. Notably, study participants who had poor  
186 neutralizing titers against Omicron after two immunizations had increased their titers following  
187 the boost (**Fig. 1D**). Sera from previously infected study participants were on average 3-4-fold  
188 higher than those without previous infection and had a similar ratio of neutralizing titers among  
189 the different variants. Sera from previously infected study participants post-boost achieved high  
190 neutralizing titers against the Beta and Delta variants. While titers against Omicron also rose,  
191 they remained 16-fold lower on average than that of D614G virus (14,868 for D614G; 921 for  
192 Omicron).

193

#### 194 **Virus with the Omicron spike protein is resistant to therapeutic monoclonal antibodies.**

195 The Regeneron monoclonal antibody cocktail used for the treatment of COVID-19 consists of  
196 REGN10933 (Casirivimab) and REGN10987 (Imdevimab); the Eli Lilly and Company cocktail  
197 consists of LY-CoV016 (Etesevimab) and LY-CoV555 (Bamlanivimab). In addition, VIR-7831  
198 (Sotrovimab) from GlaxoSmithKline and VIR Biotechnology has recently been given EUA  
199 approval. To determine the sensitivity of the Omicron variant to the therapeutic monoclonal  
200 antibodies, we analyzed their neutralizing titers against the D614G, Beta and Omicron spike  
201 protein pseudotyped viruses. REGN10933 potently neutralized D614G and Delta, was less  
202 active against Beta but had no detectable activity against Omicron (**Fig. 2A**). REGN10987 also  
203 potently neutralized the earlier viruses but lacked activity against Omicron virus as did the  
204 REGN10933/REGN10987 cocktail. LY-CoV555 neutralized D614G and Alpha virus, had weak  
205 activity against Beta and Delta but was inactive against the Omicron virus (**Fig. 2B**). LY-CoV016  
206 potently neutralized the earlier viruses but lacked activity against Omicron virus as did the  
207 combined LY-CoV555/LY-CoV016 cocktail. VIR-7831 was active against Omicron but its IC50  
208 was around 172-fold lower than against D614G (**Figure 2C**) and lower still when compared to

209 the IC<sub>50</sub> of the other monoclonal antibodies against the D614G virus. IC<sub>50</sub>s calculated from the  
210 curves in Figures 2A and B are shown in **Figure 2D**.

211

212 To determine which of the Omicron spike protein mutations allowed escape from neutralization,  
213 we tested the therapeutic monoclonal antibodies against a panel of viruses pseudotyped by  
214 spike proteins with the individual mutations of the Omicron RBD (**Fig. 3A**). While most of the  
215 single mutations had no effect, specific mutations significantly decreased monoclonal antibody  
216 inhibitory activity (increased IC<sub>50</sub>). REGN10933 activity was affected by mutations K417N,  
217 E484A and Q493K (**Fig. 3B and 3C**). REGN10987 was affected by mutations S371L, S373P,  
218 N440K, G446S with minor effects of several other mutations. The REGN10933/REGN10987  
219 cocktail maintained most of its neutralization potency against the single point mutated virus.  
220 Etesevimab was affected by K417N, Q493K, Q498R and N501Y. Bamlanivimab inhibitory  
221 activity was ablated by mutations E484A and Q493K, while several other mutations had small  
222 effects. With the exception of E484A, most of the mutations had modest effects on neutralizing  
223 titer suggesting that the loss of activity by the monoclonal antibodies results from the combined  
224 effect of the full complement of Omicron spike protein mutations.

225

226 The published crystal and cryo-electron microscopy structures of Fabs from neutralizing  
227 antibodies bound to the SARS-CoV-2 spike protein provide insights into how mutations in the  
228 Omicron spike protein interfere with antibody binding (**Figure 3C**). The efficacy of Casirivimab  
229 (REGN10933) is compromised by mutations K417N, E484A, and Q493K. In the structure of the  
230 Casirivimab Fab-spike protein, these mutations are situated in the interface with the Fab heavy  
231 chain (Figure 3C). K417N would cause a loss of hydrogen bonding with T28 and T102 of the  
232 heavy chain, as well as the loss of a favorable electrostatic interaction with D31 of the heavy  
233 chain. E484A would result in the loss of hydrogen bonding with Y53 and S56 of the heavy chain,  
234 and Q493K would result in the loss of hydrogen bonding with N74 of the heavy chain.

235

236 For Imdevimab (REGN10987), four mutations in the Omicron spike protein lead to significant  
237 loss of efficacy: S371L, S373P, N440K, and G446S. The N440K mutation would create steric  
238 clashes between K440 and the heavy and light chains and result in charge repulsion with K55 of  
239 the light chain. Mutation of G446 to any other (larger) residue (e.g., G446S) would cause a  
240 steric clash with N57 of the heavy chain. Mutation of amino acids S371 and S373 adversely  
241 affect antibody activity but do not directly contact the Fab (Figure 3C); mutation of these amino  
242 acids could alter the stability of this loop segment, affecting the conformation of the nearby  
243 region (N440) of antibody binding.

244

245 For Bamlanivimab (LY-CoV555), E484A would result in the loss of salt bridges with R50 of the  
246 heavy chain and R96 of the light chain. Q493K would result in loss of a hydrogen bond with  
247 R104 of the heavy chain, and, critically, a lysine at this position would cause a steric and  
248 electrostatic clash with R104 of the heavy chain.

249

250 For Etesevimab (LY-CoV016), K417N would result in the loss of a salt bridge with D104 of the  
251 light chain, Q493K would result in the loss of a hydrogen bond with Y102 of the heavy chain,  
252 and lysine at this position would cause a steric clash with Y102. An arginine at position 498  
253 (Q498R) would cause charge repulsion with R31 of the light chain. N501Y would be predicted to  
254 destabilize the local conformation of the spike protein, and tyrosine at this position would cause  
255 a steric clash with S28 of the light chain.

## 256 **Discussion**

257

258 The emergence of the Omicron variant represents an evolutionary leap by SARS-CoV-2 in  
259 which 15 mutations were introduced into the RBD along with mutations and deletions in the  
260 NTD and CTD. As a result, the Omicron variant has developed resistance to neutralization by  
261 the serum antibodies of recovered individuals who had been infected with earlier SARS-CoV-2  
262 variants to a degree that is expected to increase the number of individuals who become re-  
263 infected. In addition, virus with the Omicron spike has a high degree of resistance to  
264 neutralization by vaccine-elicited antibodies. The resistance might be expected given that  
265 current EUA approved vaccines encode the earlier D614G spike protein. While Alpha, Beta,  
266 Gamma and Delta VOCs show about a 3-4-fold resistance to neutralization by vaccine-elicited  
267 antibodies [2-7], virus with the Omicron spike protein has increased its resistance to  
268 neutralization by the serum antibodies of individuals fully vaccinated with BNT162b2 or  
269 Moderna-1273 by about 2640-fold, resulting in titers that are predicted by mathematical  
270 modeling to cause an increased frequency of breakthrough infections [19, 20].

271

272 Homologous boosting of SARS-CoV-2-inexperienced individuals by immunization with the Pfizer  
273 BNT162b2 vaccine increased neutralizing antibody titers against Omicron to levels that are  
274 predicted to be highly protective, although the titers remained about 10-fold below those against  
275 the other VOCs post-boost and the durability of the titers remains to be determined. Booster  
276 immunization of SARS-CoV-2 experienced individuals resulted in neutralizing antibody titers  
277 against Omicron approaching an IC<sub>50</sub> of 1000, which as predicted by modeling will provide 90%  
278 protection against infection.

279

280 Our findings on monoclonal antibody neutralization of the Omicron variant suggest that the  
281 monoclonal antibodies currently in widespread use may become ineffective. REGN10933  
282 (Casirivimab) and REGN10987 (Imdevimab) that constitute the Regeneron cocktail [18, 19] and

283 LY-CoV555 (Bamlanivimab) [20, 21] and LY-CoV016 (Etesevimab) [22, 23] that constitute the  
284 Eli Lilly cocktail all failed to neutralize the virus. The recently approved VIR-7831 (Sotrovimab)  
285 [24] had significant neutralizing activity against virus with the Omicron spike protein although  
286 this was significantly decreased compared to titers against the other VOCs. Sotrovimab was  
287 172-fold less active against the Omicron virus compared to the D614G virus. While neutralizing  
288 activity is considerably decreased, in treated patients, the antibody achieves a concentration of  
289 24 µg/ml following a 500 mg dose. This concentration is well above the IC<sub>50</sub> of Sotrovimab  
290 determined in tissue culture, and thus the antibody may prove beneficial for the treatment of  
291 COVID-19.

292

293 Mapping of the amino acid residues responsible for the escape from the monoclonal antibodies  
294 showed that most of the mutations had no effect but that several had partial effects on  
295 neutralization. The only mutation that had a dramatic effect was E484A, which ablated  
296 neutralization by LY-CoV555. The other mutations that compromised antiviral activity had  
297 modest effects. Thus, it was the cumulative effect of several mutations that abrogated antiviral  
298 activity for the other monoclonal antibodies. REGN10933, the neutralizing activity of which has  
299 been previously found to be affected by E484K and K417N of the Beta spike protein [3, 25, 26],  
300 is decreased another 8-fold by E484A of Omicron. REGN10987, which is nearly impervious to  
301 mutations in the earlier VOCs, was compromised by the constellation of five of Omicron  
302 mutations (S371L, S373P, N440K, G446S). K417N had a major effect (40-fold) on the activity of  
303 Etesevimab. The findings suggest that the Regeneron and Eli Lilly cocktails will not be effective  
304 for the treatment of patients infected by the Omicron variant. The effectiveness of Sotrovimab  
305 cannot be predicted from these data but it would seem likely that it will not be as effective on  
306 patients infected with Omicron variant as compared to those with Delta or other variants.

307

308 Our findings suggest that while the frequency of infections with the Omicron variant are likely to  
309 increase, the titers achieved by full vaccination followed by a booster immunization will protect

310 most individuals from developing severe disease. The T cell response induced by vaccination,  
311 which is less prone to immune escape, may also provide additional protection. Our findings  
312 provide further support for the benefits of booster immunization and point to the need to develop  
313 additional therapeutics for the treatment of COVID-19.

314

315 The emergence of the Omicron variant raises concern about the possibility of additional  
316 evolutionary leaps for the virus and the need to preempt any such variants before they emerge.  
317 While the current surge in Omicron infections may increase hospitalization and mortality, there  
318 is also an increased likelihood of leading to herd immunity that may protect against future  
319 variants. The inclusion of additional antigens in the vaccines to further increase the T cell  
320 response may also prove beneficial in this regard.

321

322 **Study Limitations.** This study was done on a relatively small number of participants which  
323 limits the resolution of fine difference in antibody titers in the different groups. In addition, it  
324 depends entirely on pseudotyped viruses rather than antibody neutralization of live virus. While  
325 pseudotyped virus has been shown to provide similar data to that of the live virus assays, it is  
326 conceivable that there could be differences [30].

327

328

### 329 **Acknowledgements**

330 The work was funded by grants from the NIH to N.R.L. (DA046100, AI122390 and AI120898)  
331 and to M.J.M. (UM1AI148574).

332

### 333 **Author contributions**

334 T.T. and N.R.L. designed the experiments. T.T., H.Z., B.M.D. and V.C. carried out the  
335 experiments and analyzed data. S.R.H. provided protein structural analyses. T.T., H.Z. and

336 N.R.L. wrote the manuscript. M.I.S., R.H. and M.J.M supervised specimen selection and the  
337 collection of clinical information.

338

339 **Declaration of Interests.**

340 M.J.M. received research grants from Lilly, Pfizer, and Sanofi and serves on advisory boards for  
341 Pfizer, Merck, and Meissa Vaccines.

342 **Figure Legends**

343

344 **Figure 1. Decreased neutralization of Omicron spike protein-pseudotyped viruses by**  
345 **convalescent sera, mRNA vaccine-elicited antibodies.**

346 D614G, Beta, Delta and Omicron spike protein-pseudotyped viruses expressing dual  
347 GFP/nanoluciferase reporter genes with codon-optimized spike proteins deleted for the carboxy-  
348 terminal 19 amino acids were prepared as previously described [18]. Equivalent amounts of  
349 virus were mixed with a 2-fold serial dilution of donor serum and then applied to ACE2.293T  
350 cells. Luciferase activity was measured two days post-infection. Each serum dilution was  
351 measured in triplicate and the experiment was done twice with similar results and IC50 was  
352 determined. Statistical significance was calculated by two-sided testing. (\* $P \leq 0.05$ , \*\* $P \leq 0.01$ ,  
353 \*\*\* $P \leq 0.001$ , \*\*\*\* $P \leq 0.0001$ ).

354 A. Neutralizing antibody titers of sera from study participants who had recovered from infection  
355 prior to the appearance of the current VOCs was measured against viruses pseudotyped by  
356 current VOCs (n=10). IC50 of each donor serum is shown with the Geometric mean titer (GMT)  
357 for each group shown above the bar.

358

359 B. Neutralization of variant spike protein pseudotyped viruses by the sera of study participants  
360 fully vaccinated (two immunizations) with Pfizer BNT162b2 (n=9) and Moderna mRNA-1273  
361 mRNA vaccines (n=8).

362

363 C. Neutralizing antibody titers of study participants without or with a previous history of SARS-  
364 CoV-2 infection were measured on the pseudotyped viruses. Sera were collected from study  
365 participants pre-vaccination, 1-month post-second vaccination with Pfizer BNT162b2, 7-8  
366 months post-second vaccination, and 1-month post-boost. Study participants were without  
367 previous SARS-CoV-2 infection (left) (n=12) or previously infected (right) (n=7). COVID-19



368 history was determined by symptoms and a PCR+ test or serology. GMTs for each group are  
369 shown above the bar.

370

371 D. Sequential neutralizing antibody titers of sera from individual study participants without or  
372 with previous history of SARS-CoV-2 infection is shown for each of the study participants shown  
373 above in C. GMTs are shown above.

374

375 **Figure 2. Therapeutic monoclonal antibodies have lost neutralizing activity against virus**  
376 **with the Omicron spike protein.**

377 A. Neutralization of viruses with the VOC spike proteins by Regeneron REGN10933 and  
378 REGN10987 monoclonal antibodies and the REGN-CoV-2 cocktail was measured using spike  
379 variant spike protein-pseudotyped viruses.

380 B. Neutralization of viruses pseudotyped by the VOC spike proteins by LY-CoV555  
381 (Bamlanivimab) and LY-CoV016 (Etesevimab) monoclonal antibodies was measured as in A  
382 above.

383

384 C. Neutralization of viruses pseudotyped by the VOC spike proteins by VIR-7831 (Sotrovimab)  
385 was measured as in A above.

386

387 D. The table shows the IC50s of the therapeutic monoclonal antibodies calculated using the  
388 data from the antibody neutralization curves shown in A, B and C. Larger numbers indicate  
389 decreased neutralization potency.

390

391 **Figure 3. Omicron spike protein mutations that cause escape from therapeutic**  
392 **monoclonal antibodies are located at the antibody interaction interface.**

393 A. The location of Omicron mutations on the spike protein is diagrammed. The location of the  
394 S1 and S2 subunits of the processed spike protein, NTD, RBD, SD1, SD2, HR1, HR2, TM and  
395 IC domains are shown. Amino acid positions of the domains are labeled below. The furin  
396 cleavage site and hydrophobic fusion peptide (FP) are indicated.

397

398 B. The table shows the IC<sub>50</sub>s calculated from the neutralization curves shown in Supplementary  
399 Figure 1. Mutations that caused >5-fold increase in IC<sub>50</sub> are highlighted.

400

401 C. The structures of Fabs from neutralizing antibodies bound to the SARS-CoV-2 spike protein  
402 are shown. For each antibody, the spike protein monomer is colored green, the Fab light chain  
403 is magenta, and Fab heavy chain is cyan. Mutations that adversely affect the neutralizing  
404 efficacy of each antibody are labeled, with the side chains of the D614G spike protein amino  
405 acid residues shown in sphere representation. Carbon atoms are colored green, oxygen atoms  
406 red, and nitrogen atoms blue. The PDB accession codes for the structures are 6XDG  
407 (Casirivimab and Imdevimab), 7KMG (Bamlanivimab), and 7C01 (Etesevimab).

408

409 **Supplementary Figure 1. Neutralization of pseudotyped virus with individual mutations**  
410 **by monoclonal antibodies.**

411 Neutralization curves were generated for the monoclonal antibodies (Casirivimab, Imdevimab,  
412 Bamlanivimab, Etesevimab and Sotrovimab) on viruses pseudotyped by spike proteins with the  
413 individual Omicron RBD and cleavage site mutations. All of the spike proteins tested contain the  
414 D614G mutation. Neutralization curves were generated for the monoclonal antibodies on  
415 viruses pseudotyped by spike proteins with the individual Omicron RBD mutations. The  
416 mutations tested include all of the mutations in the RBD and three carboxy-terminal mutations in  
417 S1 (H655Y, N679K and P681H).

418



420 **Literature Cited**

- 421 1. EUA. 2021. [https://www.fda.gov/emergency-preparedness-and-response/mcm-legal-](https://www.fda.gov/emergency-preparedness-and-response/mcm-legal-regulatory-and-policy-framework/emergency-use-authorization)  
422 [regulatory-and-policy-framework/emergency-use-authorization](https://www.fda.gov/emergency-preparedness-and-response/mcm-legal-regulatory-and-policy-framework/emergency-use-authorization).
- 423 2. WHO. **2021**: <https://www.who.int/en/activities/tracking-SARS-CoV-2-variants/>.
- 424 3. Tada T, Dcosta BM, Samanovic MI, et al. Convalescent-Phase Sera and Vaccine-  
425 Elicited Antibodies Largely Maintain Neutralizing Titer against Global SARS-CoV-2  
426 Variant Spikes. *mBio* **2021**; 12(3): e0069621.
- 427 4. Wang P, Nair MS, Liu L, et al. Antibody resistance of SARS-CoV-2 variants B.1.351 and  
428 B.1.1.7. *Nature* **2021**.
- 429 5. Planas D, Veyer D, Baidaliuk A, et al. Reduced sensitivity of SARS-CoV-2 variant Delta  
430 to antibody neutralization. *Nature* **2021**; 596(7871): 276-80.
- 431 6. Wall EC, Wu M, Harvey R, et al. AZD1222-induced neutralising antibody activity against  
432 SARS-CoV-2 Delta VOC. *Lancet* **2021**; 398(10296): 207-9.
- 433 7. Davis C, Logan N, Tyson G, et al. Reduced neutralisation of the Delta (B.1.617.2)  
434 SARS-CoV-2 variant of concern following vaccination. *PLoS Pathog* **2021**; 17(12):  
435 e1010022.
- 436 8. Choi A, Koch M, Wu K, et al. Serum Neutralizing Activity of mRNA-1273 against SARS-  
437 CoV-2 Variants. *J Virol* **2021**; 95(23): e0131321.
- 438 9. Lopez Bernal J, Andrews N, Gower C, et al. Effectiveness of Covid-19 Vaccines against  
439 the B.1.617.2 (Delta) Variant. *N Engl J Med* **2021**; 385(7): 585-94.
- 440 10. Thomas SJ, Moreira ED, Jr., Kitchin N, et al. Safety and Efficacy of the BNT162b2  
441 mRNA Covid-19 Vaccine through 6 Months. *N Engl J Med* **2021**; 385(19): 1761-73.
- 442 11. Scobie HM, Johnson AG, Suthar AB, et al. Monitoring Incidence of COVID-19 Cases,  
443 Hospitalizations, and Deaths, by Vaccination Status - 13 U.S. Jurisdictions, April 4-July  
444 17, 2021. *MMWR Morb Mortal Wkly Rep* **2021**; 70(37): 1284-90.

- 445 12. Razonable RR, Pawlowski C, O'Horo JC, et al. Casirivimab-Imdevimab treatment is  
446 associated with reduced rates of hospitalization among high-risk patients with mild to  
447 moderate coronavirus disease-19. *EClinicalMedicine* **2021**; 40: 101102.
- 448 13. Group A-TL-CS, Lundgren JD, Grund B, et al. A Neutralizing Monoclonal Antibody for  
449 Hospitalized Patients with Covid-19. *N Engl J Med* **2021**; 384(10): 905-14.
- 450 14. Lilly. New data show treatment with Lilly's neutralizing antibodies bamlanivimab (LY-  
451 CoV555) and etesevimab (LY-CoV016) together reduced risk of COVID-19  
452 hospitalizations and death by 70 percent. **2021**.
- 453 15. Group AC-TflwC-S. Efficacy and safety of two neutralising monoclonal antibody  
454 therapies, sotrovimab and BRII-196 plus BRII-198, for adults hospitalised with COVID-19  
455 (TICO): a randomised controlled trial. *Lancet Infect Dis* **2021**.
- 456 16. NGS-SA. SARS-CoV-2 Sequencing Update. **2021**.
- 457 17. Kannan SR, Spratt AN, Sharma K, Chand HS, Byrareddy SN, Singh K. Omicron SARS-  
458 CoV-2 variant: Unique features and their impact on pre-existing antibodies. *Journal of*  
459 *Autoimmunity* **2022**; 126: 102779.
- 460 18. Tada T, Fan C, Chen JS, et al. An ACE2 Microbody Containing a Single Immunoglobulin  
461 Fc Domain Is a Potent Inhibitor of SARS-CoV-2. *Cell Rep* **2020**; 33(12): 108528.
- 462 19. Khoury DS, Cromer D, Reynaldi A, et al. Neutralizing antibody levels are highly  
463 predictive of immune protection from symptomatic SARS-CoV-2 infection. *Nature*  
464 *Medicine* **2021**; 27(7): 1205-11.
- 465 20. Gilbert PB, Montefiori DC, McDermott AB, et al. Immune correlates analysis of the  
466 mRNA-1273 COVID-19 vaccine efficacy clinical trial. *Science* **2021**: eab3435.
- 467 21. Weinreich DM, Sivapalasingam S, Norton T, et al. REGN-COV2, a Neutralizing Antibody  
468 Cocktail, in Outpatients with Covid-19. *N Engl J Med* **2021**; 384(3): 238-51.
- 469 22. Baum A, Ajithdoss D, Copin R, et al. REGN-COV2 antibodies prevent and treat SARS-  
470 CoV-2 infection in rhesus macaques and hamsters. *Science* **2020**; 370(6520): 1110-5.

- 471 23. Chen P, Nirula A, Heller B, et al. SARS-CoV-2 Neutralizing Antibody LY-CoV555 in  
472 Outpatients with Covid-19. *N Engl J Med* **2021**; 384(3): 229-37.
- 473 24. Jones BE, Brown-Augsburger PL, Corbett KS, et al. LY-CoV555, a rapidly isolated  
474 potent neutralizing antibody, provides protection in a non-human primate model of  
475 SARS-CoV-2 infection. *bioRxiv* **2020**.
- 476 25. Dougan M, Nirula A, Azizad M, et al. Bamlanivimab plus Etesevimab in Mild or Moderate  
477 Covid-19. *N Engl J Med* **2021**; 385(15): 1382-92.
- 478 26. Shi R, Shan C, Duan X, et al. A human neutralizing antibody targets the receptor-binding  
479 site of SARS-CoV-2. *Nature* **2020**; 584(7819): 120-4.
- 480 27. Gupta A, Gonzalez-Rojas Y, Juarez E, et al. Early Treatment for Covid-19 with SARS-  
481 CoV-2 Neutralizing Antibody Sotrovimab. *N Engl J Med* **2021**; 385(21): 1941-50.
- 482 28. Chen RE, Winkler ES, Case JB, et al. In vivo monoclonal antibody efficacy against  
483 SARS-CoV-2 variant strains. *Nature* **2021**; 596(7870): 103-8.
- 484 29. Onodera T, Kita S, Adachi Y, et al. A SARS-CoV-2 antibody broadly neutralizes SARS-  
485 related coronaviruses and variants by coordinated recognition of a virus-vulnerable site.  
486 *Immunity* **2021**; 54(10): 2385-98 e10.
- 487 30. Noval MG, Kaczmarek ME, Koide A, et al. Antibody isotype diversity against SARS-CoV-  
488 2 is associated with differential serum neutralization capacities. *Scientific Reports* **2021**;  
489 11(1): 5538.

490

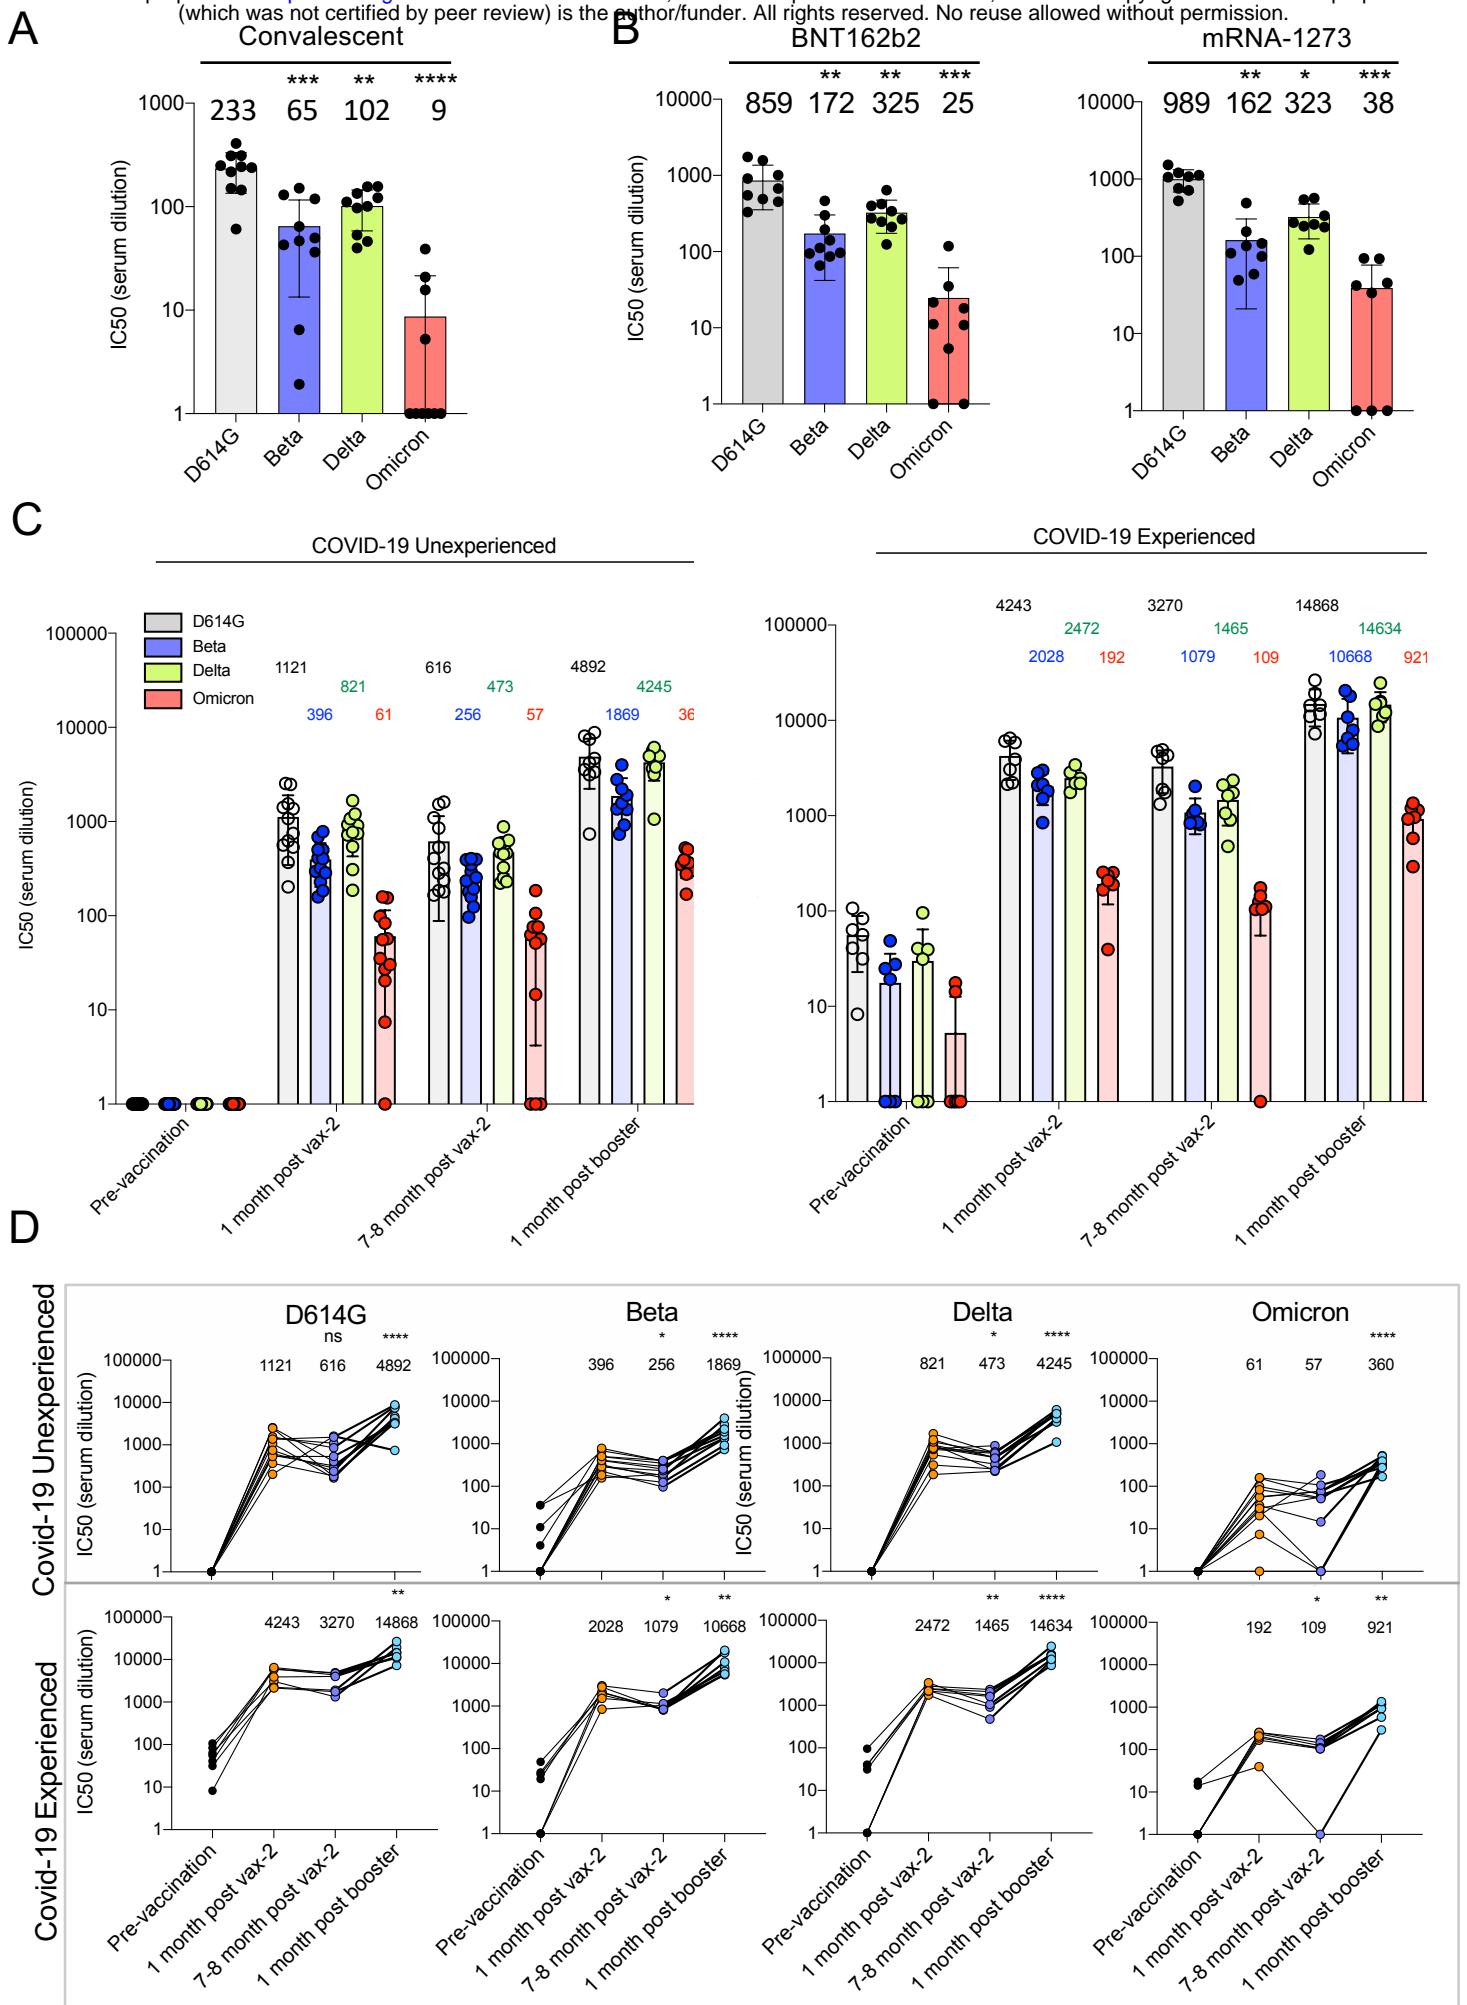

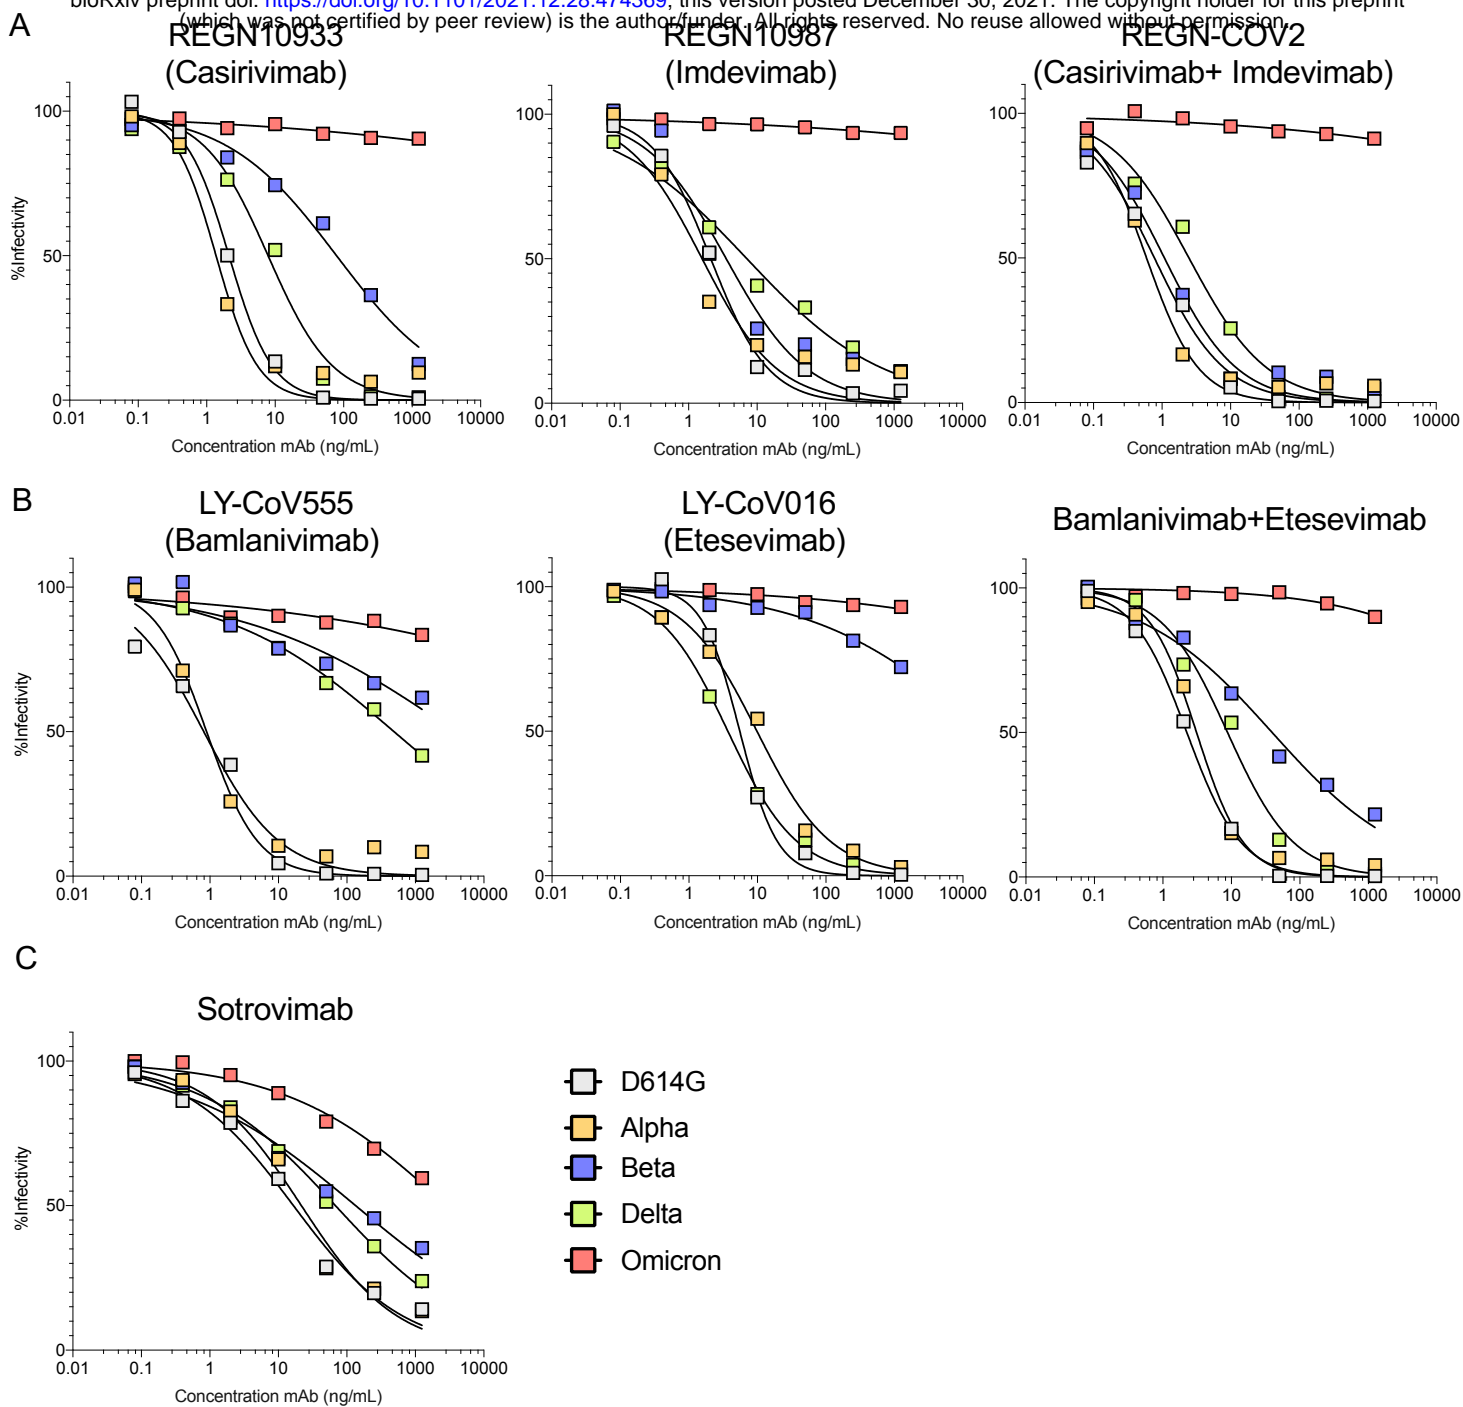

**Figure. 2**



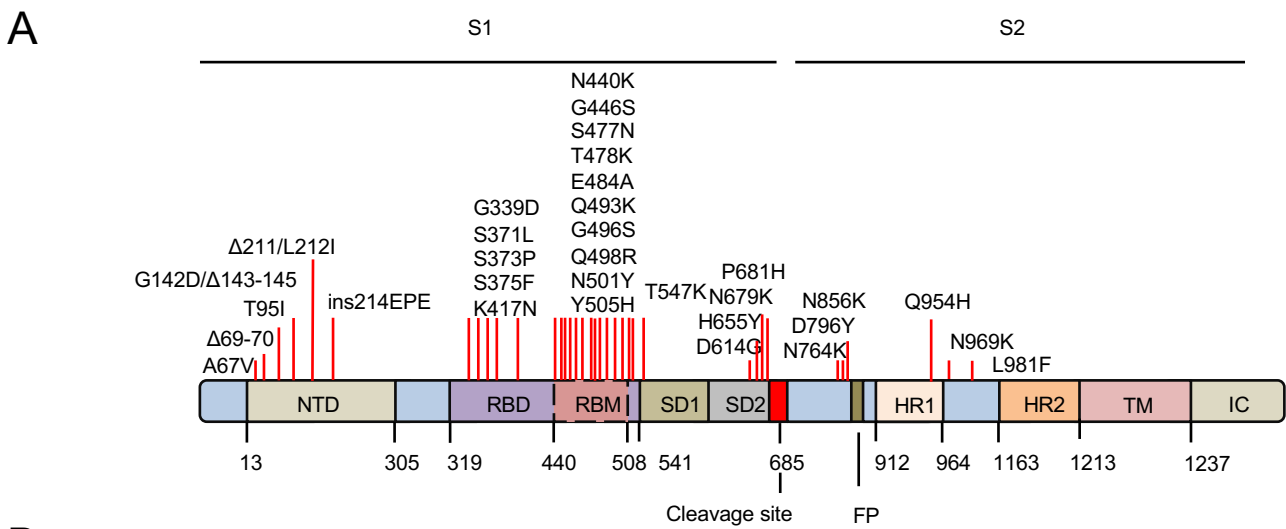

**B**

|                          | IC50 (ng/ml) |       |       |       |       |       |       |       |       |       |
|--------------------------|--------------|-------|-------|-------|-------|-------|-------|-------|-------|-------|
|                          | G339D        | S371L | S373P | S375F | K417N | N440K | G446S | S477N | T478K | E484A |
| REGN10933 (Casirivimab)  | 1.4          | 1.2   | 1.3   | 1.0   | 44.6  | 1.5   | 0.7   | 2.3   | 1.4   | 8.5   |
| REGN10987 (Imdevimab)    | 2.4          | 8.7   | 9.5   | 2.0   | 2.5   | 44.0  | >1000 | 2.1   | 2.6   | 3.8   |
| REGN-COV2                | 1.1          | 1.7   | 1.8   | 0.5   | 1.5   | 1.8   | 2.0   | 1.3   | 0.8   | 2.6   |
| LY-CoV555 (Bamlanivimab) | 1.3          | 0.4   | 0.9   | 1.1   | 0.8   | 1.2   | 1.2   | 1.0   | 1.2   | 186.8 |
| LY-CoV016 (Etesevimab)   | 1.4          | 5.1   | 3.8   | 1.0   | >1000 | 1.8   | 1.0   | 1.8   | 1.3   | 6.0   |
| Sotrovimab               | 22.4         | 264.7 | 141.4 | 24.0  | 23.0  | 30.1  | 12.4  | 38.7  | 81    | 6.2   |

  

|                          | IC50 (ng/ml) |       |       |       |       |       |       |       |       |       |
|--------------------------|--------------|-------|-------|-------|-------|-------|-------|-------|-------|-------|
|                          | Q493K        | G496S | Q498R | N501Y | Y505H | T547K | D614G | H655Y | N679K | P681H |
| REGN10933 (Casirivimab)  | 130.3        | 1.3   | 2.7   | 1.3   | 1.0   | 1.3   | 1.0   | 0.9   | 1.1   | 0.8   |
| REGN10987 (Imdevimab)    | 1.4          | 2.1   | 5.2   | 3.0   | 1.4   | 2.9   | 2.0   | 2.1   | 1.6   | 1.5   |
| REGN-COV2                | 2.2          | 0.9   | 0.4   | 0.7   | 0.6   | 1.5   | 0.6   | 0.9   | 0.4   | 0.8   |
| LY-CoV555 (Bamlanivimab) | 749.3        | 1.2   | 2.9   | 3.1   | 0.7   | 0.8   | 1.1   | 1.3   | 0.9   | 0.8   |
| LY-CoV016 (Etesevimab)   | 14.0         | 2.1   | 9.8   | 9.4   | 5.3   | 3.3   | 1.5   | 1.0   | 1.6   | 1.0   |
| Sotrovimab               | 41.1         | 62.4  | 3.7   | 7.0   | 20.0  | 20.5  | 14.2  | 13.2  | 13.0  | 37.4  |

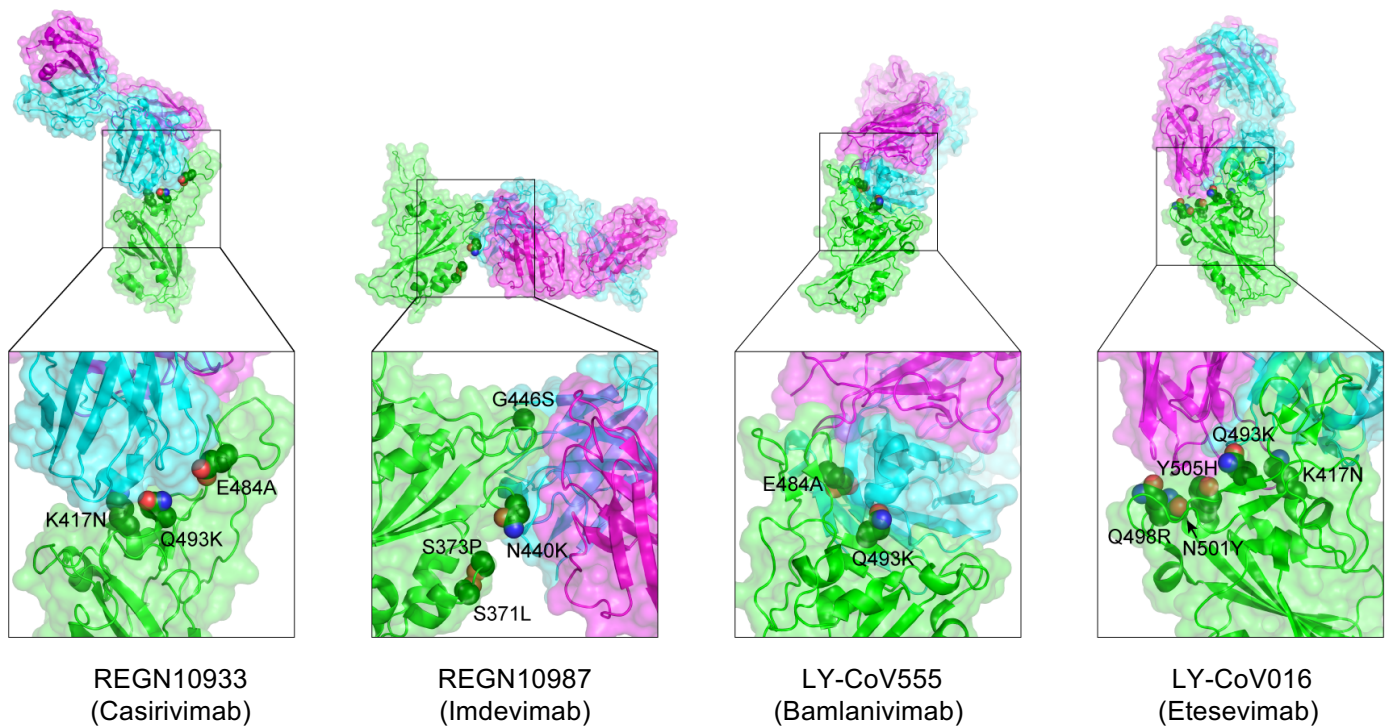

**Figure. 3**

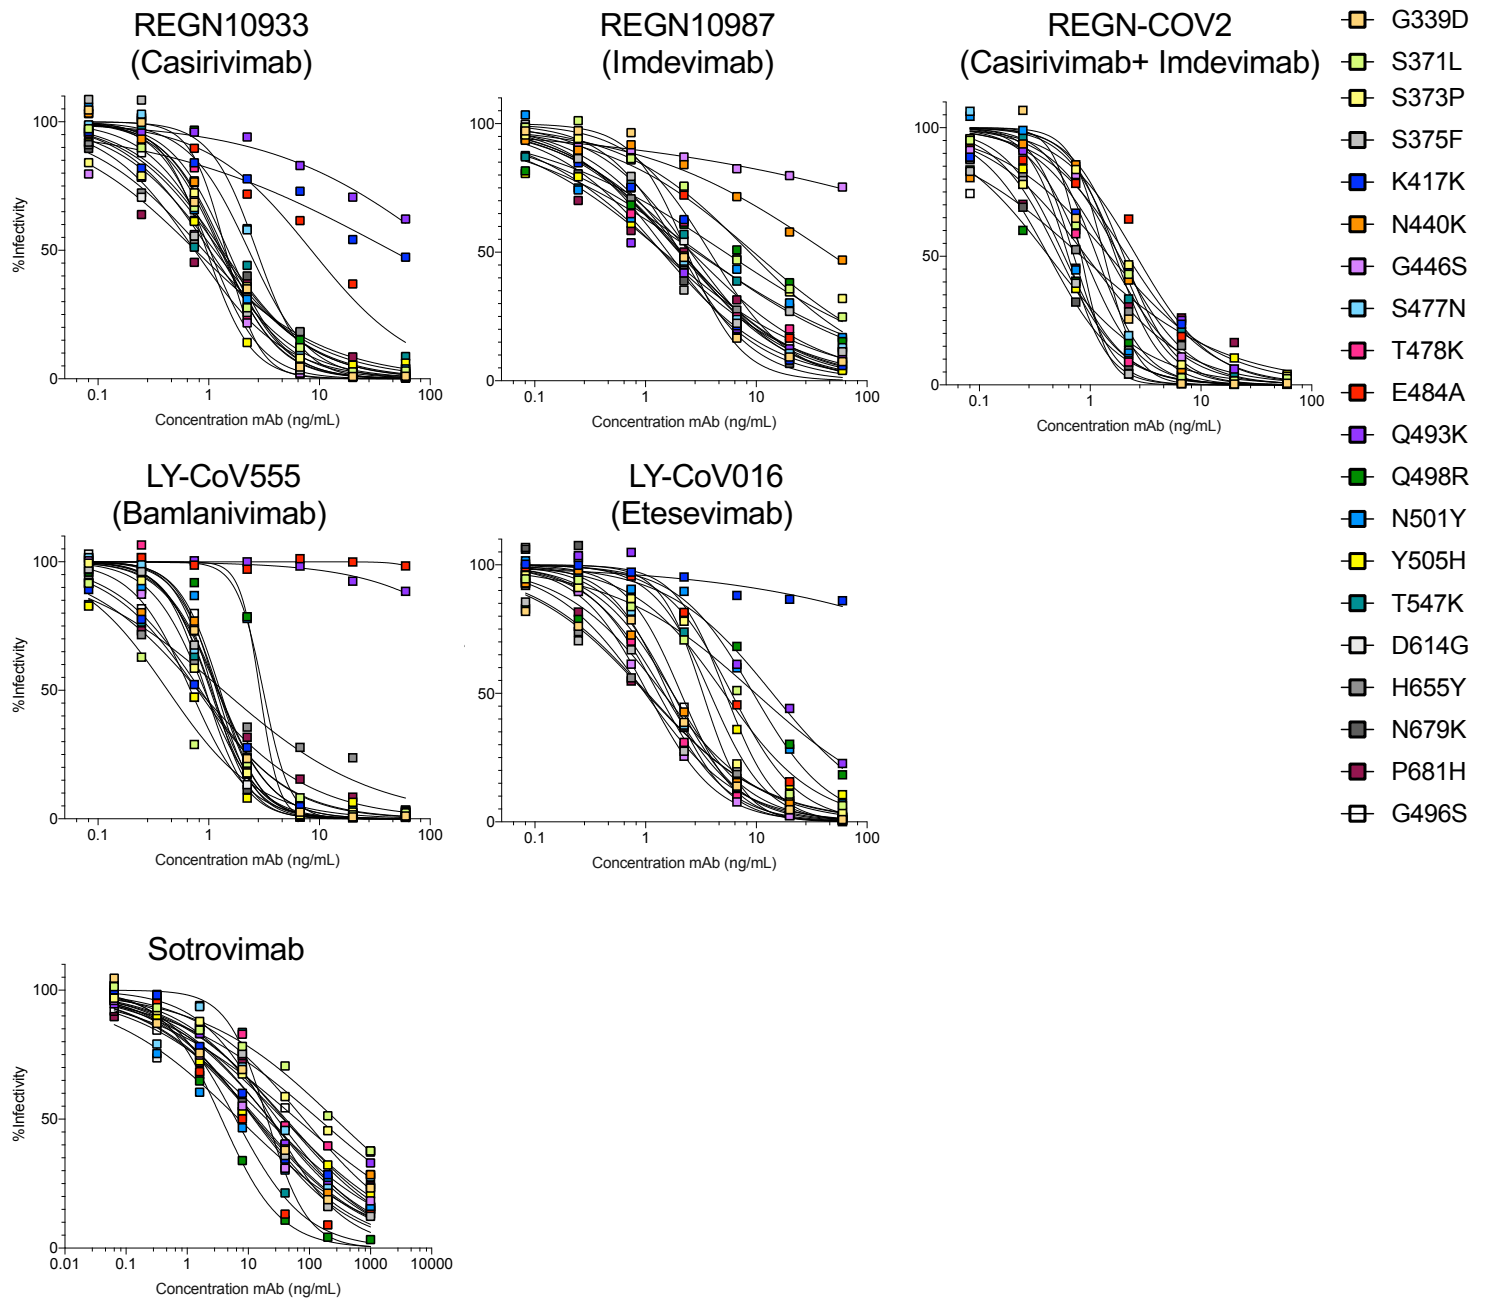

Supplemental Figure. 1
